Abstract

# COM4/392: In Vitro Diagnostic Net: Virtual community and marketplace of laboratory medicine

M Dressel

IVD-net GmbH, Freital, Germany

---

**Abstract**

---

**Introduction:** Using the Internet for laboratory needs to quickly retrieve information, such as special parameters, addresses, market news & innovations or a product's manual, is time-consuming. There exist already numerous Web sites and their number is ever-increasing. But does the useful information presented in these sites always reach the desired target group? Evidence shows that this has not happened, so far. IVD-net has identified this problem and devoted a good deal of effort to resolving it, over the last year. As an alternative to time-consuming searches in a large number of sources, IVD-net offers a centralized, firmly established Internet forum devoted to in vitro diagnostics.

**Methods:** IVD-net intends to be a guiding compass in the "jungle" of Web-pages dealing with laboratory medicine. This guidance is being created in a virtual community of specialists and interested people this field. It is the community of people connected by a common interest in in-vitro diagnostics. In this community, step-by-step, a network of knowledge and experiences is created, where each member can benefit from. IVD-net is authentic; there is no contribution without reference to the original source.

**Results:** Structure of IVD-Web-sites:

- German and English languages.
- "public" pages for welcome and orientation.
- interactive "members" pages for registered members.

Membership is free of charge. Members pages consist of:

- News: daily new information and scientific events.
- News Group: the bulletin board for your questions, answers, comments, information.
- Addresses : list of addresses and/or home pages of important partners in laboratory medicine directly linked to their URL.
- Archives: thematically arranged & handy for research.
- Hardware and Software: marketplace of instrumentation and a software catalogue. This is a virtual catalogue with efficient search functions, direct ordering options and attractive special offers of alternative suppliers!

**Discussion:** Economic globalization and increasing pressure to reduce costs in public health systems bring up a great challenge; the one of finding new solutions.

(*J Med Internet Res* 1999;1(suppl1):e17) doi: [10.2196/jmir.1.suppl1.e17](https://doi.org/10.2196/jmir.1.suppl1.e17)

---

**KEYWORDS**

In-vitro Diagnostic, Laboratory Techniques and Procedures

---

###Reviewer names will be inserted here### published 19.09.99.

*Please cite as:*

Dressel M

COM4/392: In Vitro Diagnostic Net: Virtual community and marketplace of laboratory medicine

*J Med Internet Res* 1999;1(suppl1):e17

URL: <http://www.jmir.org/1999/suppl1/e17/>

doi: [10.2196/jmir.1.suppl1.e17](https://doi.org/10.2196/jmir.1.suppl1.e17)

PMID:

Except where otherwise noted, articles published in the Journal of Medical Internet Research are distributed under the terms of the Creative Commons Attribution License (<http://www.creativecommons.org/licenses/by/2.0/>), which permits unrestricted use, distribution, and reproduction in any medium, provided the original work is properly cited.
